# Supplementary material
Source: MDPI journal article supplement (https://www.mdpi.com/search?q=crystals-10-00245)
Supplement: s001 [file crystals-10-00245-s001.pdf]

Article

# Synthesis, Crystal Structure and Bioactivities of *N*-(5-(4-chlorobenzyl)-1,3,5-Triazinan-2-Ylidene)Nitramide

Yao-Guo Qin <sup>1,2</sup>, Zhao-Kai Yang <sup>2</sup>, Jia Fan <sup>1,\*</sup>, Xin Jiang <sup>1</sup>, Xin-Ling Yang <sup>2,\*</sup> and Ju-Lian Chen <sup>1,\*</sup>

<sup>1</sup> State Key Laboratory for Biology of Plant Diseases and Insect Pests, Institute of Plant Protection, Chinese Academy of Agricultural Sciences, Beijing 100193, China; qinyg1018@163.com (Y-G.Q.); 18911895763@163.com (X.J.)

<sup>2</sup> Department of Applied Chemistry, College of Science, China Agricultural University, Beijing 100193, China; yangzhaokai@cau.edu.cn

\* Correspondence: jfan@ippcaas.cn (J.F.); yangxl@cau.edu.cn (X-L.Y.); chenjulian@caas.cn (J-L.C.)

**Table S1.** Bond Lengths for Compound 1.

| Bond       | Distance (Å) | Bond       | Distance (Å) |
|------------|--------------|------------|--------------|
| Cl(1)–C(8) | 1.7538(15)   | N(4)–N(5)  | 1.3405(17)   |
| O(1)–N(5)  | 1.2459(17)   | N(4)–C(1)  | 1.3707(19)   |
| O(2)–N(5)  | 1.2500(16)   | C(4)–C(5)  | 1.506(2)     |
| N(1)–C(2)  | 1.4476(18)   | C(5)–C(6)  | 1.390(2)     |
| N(1)–C(3)  | 1.4453(19)   | C(5)–C(10) | 1.396(2)     |
| N(1)–C(4)  | 1.4757(18)   | C(6)–C(7)  | 1.388(2)     |
| N(2)–C(1)  | 1.3310(19)   | C(7)–C(8)  | 1.380(2)     |
| N(2)–C(2)  | 1.4743(19)   | C(8)–C(9)  | 1.387(2)     |
| N(3)–C(1)  | 1.3277(19)   | C(9)–C(10) | 1.390(2)     |
| N(3)–C(3)  | 1.472(2)     |            |              |

**Table S2.** Bond angles for Compound 1.

| Angle          | (°)        | Angle           | (°)        |
|----------------|------------|-----------------|------------|
| C(2)–N(1)–C(4) | 112.61(11) | N(1)–C(3)–N(3)  | 111.35(12) |
| C(3)–N(1)–C(2) | 108.67(12) | N(1)–C(4)–C(5)  | 111.81(12) |
| C(3)–N(1)–C(4) | 113.44(12) | C(6)–C(5)–C(4)  | 119.62(14) |
| C(1)–N(2)–C(2) | 123.18(13) | C(6)–C(5)–C(10) | 118.68(14) |
| C(1)–N(3)–C(3) | 119.53(13) | C(10)–C(5)–C(4) | 121.70(13) |
| N(5)–N(4)–C(1) | 119.53(12) | C(7)–C(6)–C(5)  | 121.47(15) |
| O(1)–N(5)–O(2) | 121.48(12) | C(8)–C(7)–C(6)  | 118.35(14) |
| O(1)–N(5)–N(4) | 114.46(12) | C(7)–C(8)–Cl(1) | 118.41(12) |
| O(2)–N(5)–N(4) | 124.06(13) | C(7)–C(8)–C(9)  | 122.04(14) |
| N(2)–C(1)–N(4) | 112.72(13) | C(9)–C(8)–Cl(1) | 119.55(13) |
| N(3)–C(1)–N(2) | 119.06(14) | C(8)–C(9)–C(10) | 118.62(15) |
| N(3)–C(1)–N(4) | 128.22(14) | C(9)–C(10)–C(5) | 120.81(14) |
| N(1)–C(2)–N(2) | 111.42(12) |                 |            |

**Table S3.** Torsion angles for Compound 1.

| Torsion               | (°)         | Torsion             | (°)         |
|-----------------------|-------------|---------------------|-------------|
| Cl(1)–C(8)–C(9)–C(10) | –178.93(12) | C(3)–N(1)–C(4)–C(5) | –58.12(16)  |
| N(1)–C(4)–C(5)–C(6)   | 138.98(14)  | C(3)–N(3)–C(1)–N(2) | 2.5(2)      |
| N(1)–C(4)–C(5)–C(10)  | –40.97(19)  | C(3)–N(3)–C(1)–N(4) | –177.22(14) |

|                     |             |                      |             |
|---------------------|-------------|----------------------|-------------|
| N(5)-N(4)-C(1)-N(2) | -178.25(12) | C(4)-N(1)-C(2)-N(2)  | 77.23(15)   |
| N(5)-N(4)-C(1)-N(3) | 1.4(2)      | C(4)-N(1)-C(3)-N(3)  | -67.62(16)  |
| C(1)-N(2)-C(2)-N(1) | 18.05(19)   | C(4)-C(5)-C(6)-C(7)  | -179.65(14) |
| C(1)-N(3)-C(3)-N(1) | -35.90(18)  | C(4)-C(5)-C(10)-C(9) | 178.31(14)  |
| C(1)-N(4)-N(5)-O(1) | 175.90(12)  | C(5)-C(6)-C(7)-C(8)  | 1.2(2)      |
| C(1)-N(4)-N(5)-O(2) | -3.4(2)     | C(6)-C(5)-C(10)-C(9) | -1.6(2)     |
| C(2)-N(1)-C(3)-N(3) | 58.45(15)   | C(6)-C(7)-C(8)-Cl(1) | 177.65(12)  |
| C(2)-N(1)-C(4)-C(5) | 177.92(12)  | C(6)-C(7)-C(8)-C(9)  | -1.5(2)     |
| C(2)-N(2)-C(1)-N(3) | 6.7(2)      | C(7)-C(8)-C(9)-C(10) | 0.2(2)      |
| C(2)-N(2)-C(1)-N(4) | -173.60(13) | C(8)-C(9)-C(10)-C(5) | 1.4(2)      |
| C(3)-N(1)-C(2)-N(2) | -49.32(15)  | C(10)-C(5)-C(6)-C(7) | 0.3(2)      |

**Table S4.** Fractional atomic coordinates ( $\times 10^4$ ) and equivalent isotropic displacement parameters ( $\text{\AA}^2 \times 10^3$ ) for Compound 1.

| Atom | x        | y          | z           | U (eq)*   |
|------|----------|------------|-------------|-----------|
| Cl1  | 291.6(8) | 3228.0 (2) | 5098.7(5)   | 27.24(13) |
| O1   | 9062(2)  | 620.8(4)   | 13220.5(13) | 22.4(3)   |
| O2   | 5889(2)  | 1038.4(4)  | 12081.4(13) | 23.2(3)   |
| N1   | 4840(2)  | 729.4(5)   | 6418.6(15)  | 15.5(3)   |
| N2   | 7435(2)  | 212.5(5)   | 8275.4(15)  | 15.6(3)   |
| N3   | 4681(2)  | 807.2(5)   | 9174.6(16)  | 16.8(3)   |
| N4   | 8207(2)  | 456.7(5)   | 10768.5(14) | 15.4(3)   |
| N5   | 7660(2)  | 720.7(5)   | 12041.8(15) | 16.5(3)   |
| C1   | 6698(3)  | 509.0(6)   | 9426.5(17)  | 14.3(3)   |
| C2   | 6274(3)  | 240.4(6)   | 6676.3(17)  | 16.7(3)   |
| C3   | 3254(3)  | 786.7(6)   | 7653.4(18)  | 17.8(3)   |
| C4   | 6379(3)  | 1209.6(6)  | 6212.9(18)  | 15.6(3)   |
| C5   | 4850(3)  | 1710.3(6)  | 5888.6(18)  | 15.4(3)   |
| C6   | 5598(3)  | 2196.7(6)  | 6582.4(19)  | 20.6(3)   |
| C7   | 4235(3)  | 2666.9(6)  | 6321(2)     | 23.1(4)   |
| C8   | 2073(3)  | 2640.2(6)  | 5371.8(19)  | 19.7(3)   |
| C9   | 1264(3)  | 2163.9(6)  | 4652.1(19)  | 21.2(3)   |
| C10  | 2684(3)  | 1700.4(6)  | 4904.6(19)  | 19.3(3)   |

\*  $U_{eq}$  is defined as 1/3 of of the trace of the orthogonalised  $U_{ij}$  tensor.

**Table S5.** Anisotropic displacement parameters ( $\text{\AA}^2 \times 10^3$ ) for Compound 1. The anisotropic displacement factor exponent takes the form:  $-2\pi^2[h^2a^{*2}U_{11} + \dots + 2hka^*b^*U_{12}]$ .

| Atom | $U_{11}$ | $U_{22}$ | $U_{33}$ | $U_{23}$ | $U_{13}$ | $U_{12}$ |
|------|----------|----------|----------|----------|----------|----------|
| Cl1  | 27.8(2)  | 17.4(2)  | 36.7(3)  | 5.08(16) | 3.52(18) | 6.64(16) |
| O1   | 27.0(6)  | 24.3(6)  | 14.8(6)  | -2.6(4)  | -3.7(5)  | 3.7(5)   |
| O2   | 28.2(6)  | 20.0(6)  | 21.8(6)  | -1.3(5)  | 4.5(5)   | 11.3(5)  |
| N1   | 15.3(6)  | 13.9(6)  | 17.1(7)  | 1.2(5)   | 0.2(5)   | -0.3(5)  |
| N2   | 15.8(6)  | 15.2(6)  | 15.2(7)  | -0.7(5)  | -1.3(5)  | 4.3(5)   |
| N3   | 16.3(6)  | 20.0(7)  | 14.3(7)  | 0.2(5)   | 2.1(5)   | 5.1(5)   |
| N4   | 18.3(6)  | 14.4(6)  | 13.3(6)  | -2.2(5)  | 0.7(5)   | 3.1(5)   |
| N5   | 19.6(6)  | 13.6(6)  | 16.4(7)  | 0.2(5)   | 2.8(5)   | 1.0(5)   |
| C1   | 15.0(7)  | 11.2(7)  | 16.7(8)  | 1.6(5)   | 2.0(6)   | -1.1(5)  |
| C2   | 20.3(8)  | 13.7(7)  | 15.4(8)  | -0.2(6)  | -2.3(6)  | 1.2(6)   |
| C3   | 13.1(7)  | 19.4(7)  | 20.5(8)  | 5.0(6)   | -0.6(6)  | -0.1(6)  |
| C4   | 14.9(7)  | 14.6(7)  | 17.2(8)  | 0.9(6)   | 0.3(6)   | -0.5(6)  |
| C5   | 17.0(7)  | 15.3(7)  | 14.2(8)  | 2.5(6)   | 3.4(6)   | 0.1(6)   |
| C6   | 18.9(8)  | 18.8(7)  | 23.3(9)  | -2.0(6)  | -2.9(6)  | -0.9(6)  |
| C7   | 25.4(8)  | 15.1(7)  | 28.7(9)  | -3.1(6)  | 2.5(7)   | -2.1(6)  |
| C8   | 22.2(8)  | 14.9(7)  | 22.9(9)  | 4.9(6)   | 6.1(7)   | 4.7(6)   |
| C9   | 21.6(8)  | 20.8(8)  | 20.6(9)  | 3.2(6)   | -1.8(7)  | 1.4(6)   |

|     |         |         |         |         |         |         |
|-----|---------|---------|---------|---------|---------|---------|
| C10 | 21.4(8) | 17.4(7) | 18.2(8) | -0.7(6) | -2.9(6) | -0.4(6) |
|-----|---------|---------|---------|---------|---------|---------|

**Table S6.** Hydrogen atom coordinates ( $\text{\AA}\times 10^4$ ) and isotropic displacement parameters ( $\text{\AA}^2\times 10^3$ ) for Compound 1.

| Atom | x        | y      | z        | U (eq) |
|------|----------|--------|----------|--------|
| H2   | 8630(30) | 15(7)  | 8490(20) | 19     |
| H3   | 4320(30) | 988(7) | 9890(20) | 20     |
| H2A  | 7537     | 230    | 5961     | 20     |
| H2B  | 5218     | -71    | 6474     | 20     |
| H3A  | 2123     | 484    | 7628     | 21     |
| H3B  | 2296     | 1115   | 7498     | 21     |
| H4A  | 7377     | 1147   | 5361     | 19     |
| H4B  | 7477     | 1265   | 7142     | 19     |
| H6   | 7043     | 2207   | 7236     | 25     |
| H7   | 4767     | 2992   | 6776     | 28     |
| H9   | -197     | 2155   | 4014     | 25     |
| H10  | 2184     | 1380   | 4412     | 23     |
